# Supplementary material for: Parallel Perspectives of Patients and Doctors on Traits of a Good Doctor: A Cross-Sectional Study
Source: Research Square preprint supplement (doi:10.21203/rs.3.rs-7321297/v1), 2025-09-23
Supplement: Supplementary file 1 [file 48aecde698b5b488be8a095d.docx]

**Annex I**

**Questionnaire for Patients**

**Instructions:**

- Please read each question carefully and select the answer with a 🗹 mark.
- There are no right or wrong answers.
- All responses will be kept confidential.

**Section 1: Demographics**

Age:

Below 40 40-59 60 and above

Gender:

Male Female

Education:

12 years or below Bachelor's degree Master's degree or above

Department visited for check-up:

_____________________________________

**Section 2: Characteristics of a Good Doctor**

From the statements given below, please select **3** which you consider to be the most important attributes of a good doctor.

 Is foreign trained.

 Is not distant or arrogant but treats you with respect.

 Has extensive experience of many years.

 Is friendly, informal and jokes with you.

 Is a good teacher for medical students and junior doctors.

 Guards the patient's secrets.

 Is current with new developments in medicine.

 Gives encouragement and hope to the patient.

 Explains the disease, treatment and its side effects clearly.

 Does not discriminate between patients on the basis of financial and social status.

 Is proficient in original research and has many publications.

 Listens to the patient attentively and patiently.

Thank you for your participation in this study.

**Questionnaire for Doctors**

**Instructions:**

- Please read each question carefully and select the answer that best represents your perception of a good doctor.
- There are no right or wrong answers.
- All responses will be kept confidential.

**Section 1: Demographics**

Gender:

Male Female

Age (years):

Below 40 40-59 60 and above

Designation:

Resident Consultant

Years of Service since MBBS:

1-10 11-20 21-30 More than 30

Your Specialty: ________________________________

­­­

**Section 2: Characteristics of a Good Doctor**

From the statements given below, please select **3** which you consider to be the most important attributes of a good doctor.

 Is foreign trained.

 Is not distant or arrogant but treats the patients with respect.

 Has extensive experience of many years.

 Is friendly, informal and jokes with patients.

 Is a good teacher for medical students and junior doctors.

 Guards the patient's secrets.

 Is current with new developments in medicine.

 Gives encouragement and hope to the patient.

 Explains the disease, treatment and its side effects clearly.

 Does not discriminate between patients on the basis of financial and social status.

 Is proficient in original research and has many publications.

 Listens to the patient attentively and patiently.

Thank you for your participation in this study.
